# Supplementary material for: Leucine deprivation inhibits proliferation and induces apoptosis of human breast cancer cells via fatty acid synthase
Source: PubMed Central journal article supplement (PMC5325395; doi:10.18632/oncotarget.11626), 2016-08-26
Supplement: oncotarget-07-63679-s001.pdf [file oncotarget-07-63679-s001.pdf]

## Leucine deprivation inhibits proliferation and induces apoptosis of human breast cancer cells via fatty acid synthase

### Supplementary Materials

**Tumor fatty acid composition in leucine-deprived mice**

| fatty acid | control diet | (-) leu diet  | p     | fatty acid | control diet | (-) leu diet | p     |
|------------|--------------|---------------|-------|------------|--------------|--------------|-------|
| 14:0       | 0.70 ± 0.03  | 0.65 ± 0.08   | 0.603 | 20:1n9     | 0.60 ± 0.03  | 0.57 ± 0.04  | 0.636 |
| 15:0       | 0.18 ± 0.01  | 0.13 ± 0.01*  | 0.026 | 20:2n6     | 0.98 ± 0.31  | 0.63 ± 0.05  | 0.308 |
| 16:0       | 18.9 ± 0.49  | 16.9 ± 0.64*  | 0.047 | 20:3n6     | 1.75 ± 0.11  | 1.2 ± 0.15*  | 0.02  |
| 16:1n7     | 1.3 ± 0.17   | 2.88 ± 0.57*  | 0.029 | 20:4n6     | 14.96 ± 0.95 | 14.39 ± 1.16 | 0.718 |
| 16:1n9     | 1.17 ± 0.13  | 0.98 ± 0.10   | 0.272 | 20:5n3     | 0.24 ± 0.03  | 0.12 ± 0.01* | 0.009 |
| 17:0       | 0.35 ± 0.02  | 0.30 ± 0.02   | 0.062 | 22:0       | 0.54 ± 0.05  | 0.36 ± 0.03* | 0.011 |
| 18:0       | 17.13 ± 0.63 | 15.03 ± 1.00  | 0.126 | 22:4n6     | 4.25 ± 0.38  | 3.08 ± 0.17* | 0.024 |
| 18:1n7     | 3.06 ± 0.15  | 2.61 ± 0.09*  | 0.026 | 22:5n3     | 0.53 ± 0.03  | 0.44 ± 0.05  | 0.173 |
| 18:1n9     | 16.85 ± 0.70 | 19.99 ± 1.62  | 0.132 | 22:5n6     | 1.53 ± 0.14  | 1.04 ± 0.14* | 0.038 |
| 18:2n6     | 9.04 ± 0.78  | 11.29 ± 0.52* | 0.036 | 22:6n3     | 3.57 ± 0.25  | 3.17 ± 0.32  | 0.363 |
| 18:3n3     | 0.08 ± 0.08  | 0.08 ± 0.01   | 0.968 | 23:0       | 0.51 ± 0.05  | 0.57 ± 0.04  | 0.377 |
| 18:3n6     | 0.18 ± 0.02  | 0.15 ± 0.01   | 0.146 | 24:0       | 1.08 ± 0.09  | 0.82 ± 0.06  | 0.051 |
| 20:0       | 0.40 ± 0.03  | 0.35 ± 0.02   | 0.26  | 24:1n9     | 0.62 ± 0.03  | 0.47 ± 0.05* | 0.045 |

Data is % of total fatty acids.

**Supplementary Figure S1: Tumor fatty acid composition in leucine-deprived mice.** Nude mice bearing MDA-MB-231 xenografts were fed with control (ctrl) or (-) leu diet for 4 days. Means ± SEMs shown are representative of at least two independent experiments *in vivo*. Statistical significance was calculated using the two-tailed student *t* test for the effects of (-) leu vs. the control treatment (\**p* < 0.05).

**A** Body weight change and food intake in leucine-deprived mice

|                        | Mice with MDA-MB-231 Xenografts |                | Mice with MCF-7 Xenografts |                 |
|------------------------|---------------------------------|----------------|----------------------------|-----------------|
|                        | ctrl                            | (-) leu        | ctrl                       | (-) leu         |
| body weight change (%) | 0.52 ± 2.59                     | -13.38 ± 0.85* | 0.9 ± 1.08                 | -13.29 ± 0.65 * |
| food intake (g/day)    | 4.52 ± 1.53                     | 3.58 ± 0.23 *  | 4.37 ± 0.67                | 3.42 ± 0.06 *   |

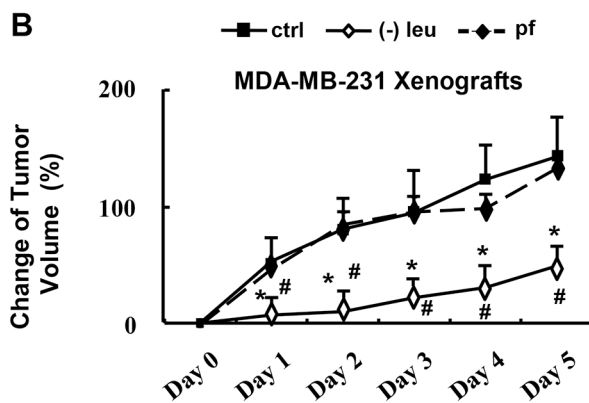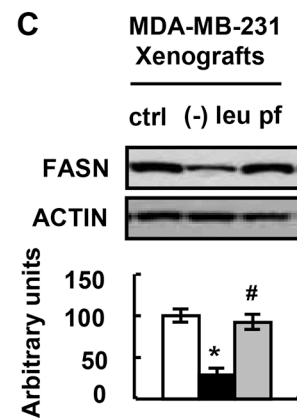

**Supplementary Figure S2: The effect of leucine-deficient diet on body weight and food intake.** (A) Nude mice bearing MDA-MB-231 or MCF-7 xenografts were fed with control (ctrl) or (-) leu diet for 4 days. (B and C) Nude mice bearing MDA-MB-231 xenografts were fed with control (ctrl), (-) leu or pair-fed (pf) diet for 5 days, followed by measurement of the tumor volume at the indicated time point in B, examination of FASN protein abundance in C. Means ± SEMs shown are representative of at least two independent *in vivo* experiments. Statistical significance was calculated using the two-tailed student *t* test for the effects of (-) leu vs. control diet ( $*p < 0.05$ ) in A, or using the one-way ANOVA followed by the Student-Newman-Keuls (SNK) test for the effects of (-) leu vs. the control treatment ( $*p < 0.05$ ) or (-) leu diet vs. pair-fed diet ( $#p < 0.05$ ) in B and C.

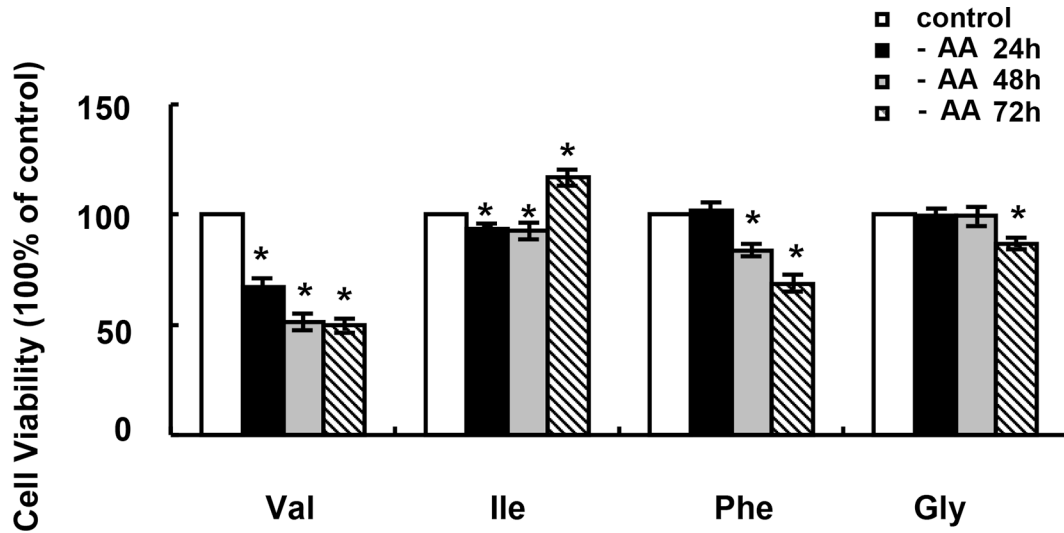

**Supplementary Figure S3: The effect of amino acid deprivation on cell viability.** MDA-MB-231 cells were incubated in control, valine-deficient (-Val), isoleucine-deficient (-Ile), phenylalanine-deficient (-Phe) or glycine-deficient (-Gly) medium for indicated time, followed by MTT assay. Statistical significance was calculated using the two-tailed Student *t* test for the effects of the amino acid-deficient medium vs. control medium ( $*p < 0.05$ ).

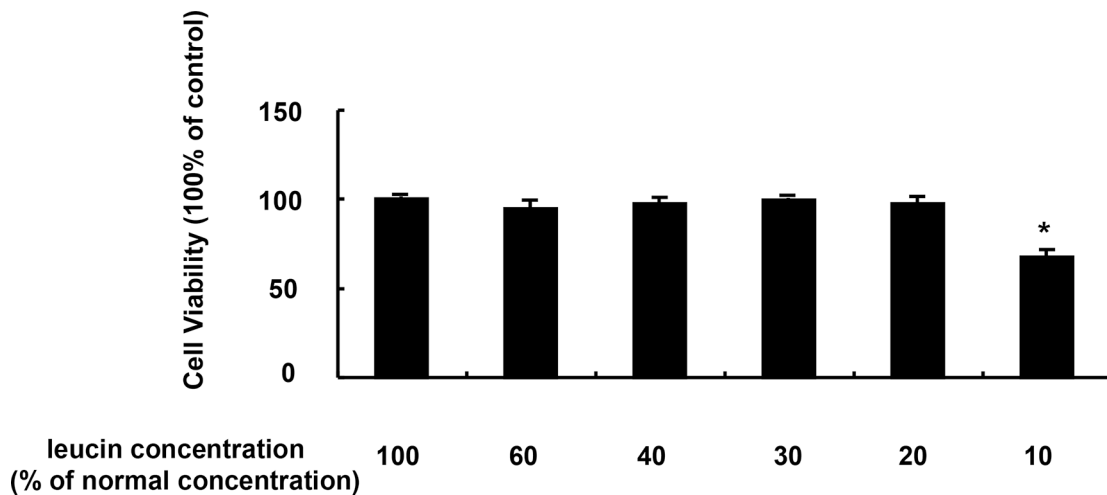

**Supplementary Figure S4: The effect of different leucine concentration medium on cell viability.** MDA-MB-231 cells were incubated in medium with different leucine concentration for 48 h, followed by MTT assay. Means  $\pm$  SEMs shown are representative of at least three independent experiments *in vitro*. Statistical significance was calculated using the two-tailed Student *t* test for the effects of the different leucine concentration medium vs. control medium ( $*p < 0.05$ ).

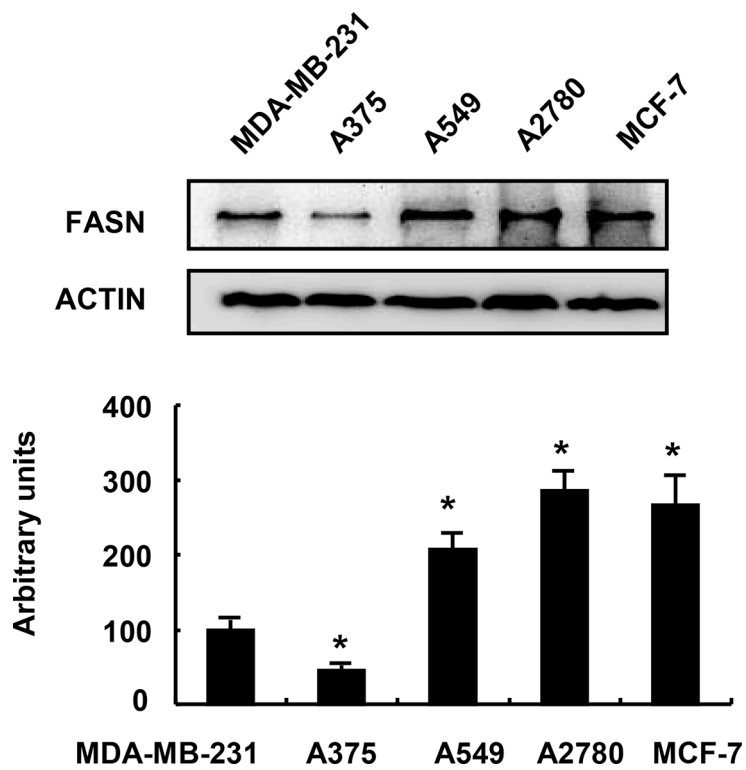

**Supplementary Figure S5: FASN protein abundance in different cancer cells.** FASN protein abundance was examined in the indicated cells. Means  $\pm$  SEMs shown are representative of at least three independent *in vitro* experiments. Statistical significance was calculated using the two-tailed Student *t* test for the effects of the indicated cells vs. MDA-MB-231 cells ( $*p < 0.05$ ).

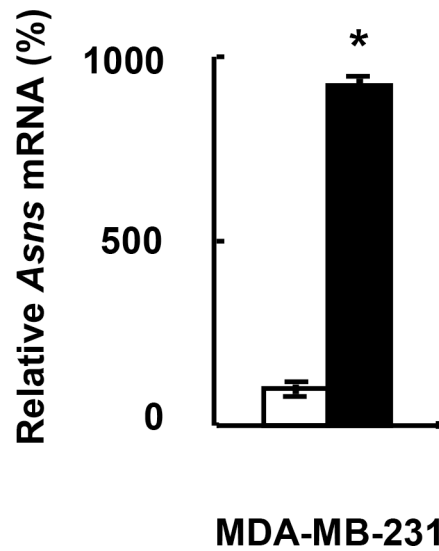

**Supplementary Figure S6: The effect of leucine deprivation on *asparagine synthetase* (*Asns*) mRNA abundance.** MDA-MB-231 cells were incubated in control (+leu) or leucine-deficient (-leu) medium for 48 h, followed by examination of the *Asns* mRNA abundance. Statistical significance was calculated using the two-tailed student *t* test for the effects of (-) leu vs. the control treatment (\* $p < 0.05$ ).

### List of oligonucleotide primer pairs used in RT-PCR analysis

| Target gene    | Forward Primer (5'-3')  | Reverse Primer (5'-3') |
|----------------|-------------------------|------------------------|
| <i>Fasn</i>    | GCAAATTCGACCTTTCTCAGAAC | GGACCCCGTGAATGTCA      |
| <i>Srebp1c</i> | TGTGCAGACAGGGCCTTTG     | CAGTGGGACTGTTGCCAAGA   |
| <i>Asns</i>    | TGAGAGGCTTCTGAGGGAATC   | ATGGGCAGCAGTAGTTCGATCT |

**Supplementary Figure S7: List of oligonucleotide primer pairs used in RT-PCR analysis.**
